# Supplementary material for: Profiling the activity of the para-caspase MALT1 in B-cell acute lymphoblastic leukemia for potential targeted therapeutic application
Source: PubMed Central journal article supplement — Haematologica. 2023 Sep 28;109(5):1348–58. doi: 10.3324/haematol.2023.283178 (PMC11063839; doi:10.3324/haematol.2023.283178), 2023-09-28
Supplement: 2023_283178_SAFA_SUPPL.pdf [file 2023_283178_SAFA_SUPPL.pdf]

# Profiling the activity of the para-caspase MALT1 in B-cell acute lymphoblastic leukemia for potential targeted therapeutic application

Firas M. Saba,<sup>1</sup> Terri Rasmussen,<sup>1</sup> Lorena Fontan,<sup>2</sup> Min Xia,<sup>2</sup> Ari Melnick,<sup>2</sup> Adrian Wiestner,<sup>3</sup> Patricia Lobelle-Rich,<sup>1</sup> Jan A. Burger,<sup>4</sup> Yara Mouawad,<sup>1</sup> Hana Safah,<sup>1</sup> Erik K Flemington<sup>5</sup> and Nakhle S. Saba<sup>1</sup>

<sup>1</sup>Section of Hematology and Medical Oncology, Deming Department of Medicine, Tulane University, New Orleans, LA; <sup>2</sup>Department of Medicine, Division of Hematology & Medical Oncology, Weill Cornell Medical College, New York, NY; <sup>3</sup>Hematology Branch, National Heart, Lung, and Blood Institute, NIH, NHLBI, Bethesda, MD; <sup>4</sup>Department of Leukemia, The University of Texas MD Anderson Cancer Center, Houston, TX and <sup>5</sup>Tulane Cancer Center, Tulane University, New Orleans, LA, USA

**Correspondence:** N. Saba  
[nsaba@tulane.edu](mailto:nsaba@tulane.edu)

**Received:** March 23, 2023.

**Accepted:** September 19, 2023.

**Early view:** September 28, 2023.

<https://doi.org/10.3324/haematol.2023.283178>

©2024 Ferrata Storti Foundation

Published under a CC BY-NC license

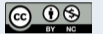

## **SUPPLEMENTARY APPENDIX**

### **Profiling the Activity of the Para-Caspase MALT1 in B-Cell Acute Lymphoblastic Leukemia for Potential Targeted Therapeutic Application.**

**Authors:** Firas M. Safa<sup>1</sup>, Terri Rasmussen<sup>1</sup>, Lorena Fontan<sup>2</sup>, Min Xia<sup>2</sup>, Ari Melnick<sup>2</sup>, Adrian Wiestner<sup>3</sup>, Patricia Lobelle-Rich<sup>1</sup>, Jan A. Burger<sup>4</sup>, Yara Mouawad<sup>1</sup>, Hana Safah<sup>1</sup>, Erik K Flemington<sup>5</sup>, Nakhle S. Saba<sup>1</sup>

#### **Affiliations:**

<sup>1</sup>Section of Hematology and Medical Oncology, Deming Department of Medicine, Tulane University, New Orleans, LA

<sup>2</sup>Department of Medicine, Division of Hematology & Medical Oncology, Weill Cornell Medical College, New York, NY

<sup>3</sup>Hematology Branch, National Heart, Lung, and Blood Institute, NIH, NHLBI, Bethesda, MD

<sup>4</sup>Department of Leukemia, The University of Texas MD Anderson Cancer Center, Houston, TX

<sup>5</sup>Tulane Cancer Center, Tulane University, New Orleans, LA

## Table of contents:

### Supplementary materials:

|                                                                                                                                                                |   |
|----------------------------------------------------------------------------------------------------------------------------------------------------------------|---|
| MTS viability assay details:.....                                                                                                                              | 3 |
| Primary and secondary antibodies used:.....                                                                                                                    | 3 |
| RNA isolation and sequencing:.....                                                                                                                             | 3 |
| Supplementary legends:.....                                                                                                                                    | 4 |
| Supplementary figures:                                                                                                                                         |   |
| Figure S1. MALT1 activity in B-ALL cell lines remained absent after pre-BCR crosslinking using anti-IgM antibodies or proteasome inhibition using MG-132. .... | 5 |
| Figure S2. MYC mRNA expression is suppressed in most B-ALL cell lines regardless of the cell of origin or sensitivity to MI-2.....                             | 6 |
| Figure S3. MALT1 promotes the pre-BCR signaling pathway via the upregulation of VPRED1 and maintains a non canonical downstream activity.....                  | 7 |
| Supplementary tables:                                                                                                                                          |   |
| Table S1 List of cell lines used according to lineage, level of maturation and Philadelphia chromosome status.....                                             | 8 |
| Table S2. List of genes up- or down-regulated genes by MI-2 in B-ALL.....                                                                                      | 9 |

## **SUPPLEMENTARY METHODS**

### **1. MTS**

Cells were incubated with MI-2 (0-8  $\mu\text{mol/L}$ ) for 48 hours or with Z-VRPR-fmk for 96 hours in 96-well plates. Patient derived cells were incubated at a concentration of 500,000 cells/well whereas cell line samples were incubated at a concentration of 75,000 cells/well. At the end of the incubation period, MTS was added and incubated for 4 hours at 37°C then the absorbance was measured using a 96-well plate reader at 490nm.

### **2. Primary and secondary antibodies**

Anti-MALT1(D-1) (sc-515389), anti-RBCK1 (E2) (sc-365523), anti-cylindromatosis1(H-6) (sc137139), MCPIP (H-6) (sc-515275) and  $\beta$ -Actin (C4) (sc-47778) all from Santa Cruz Biotechnology. Anti-c-PARP (Asp214) (#9541), Anti-RelB (C1E4) (#4922), and anti-Myc (D84C12) (#5605) were purchased from Cell Signaling Technology. Secondary antibodies used were: IRDye goat anti-rabbit (cat#926-68071) and IRDye goat anti-mouse (cat#926-32210), both from LI-COR Biosciences.

### **3. RNA sequencing**

Polyadenylated RNA was enriched by two rounds of oligo(dT) selection (Invitrogen), followed by library construction and paired-end sequencing of 50bp reads on Illumina HiSeq-2000. We used MapSplice 2 to map RNA-seq reads to human genome hg19, Samtools package (DHIGroup) to remove duplicate reads and create mpileup files, and VarScan package (Genome Institute, Washington University) for INDEL and single-nucleotide variant callings. Variants were annotated using ANNOVAR.

## SUPPLEMENTARY LEGENDS

### **Supplementary Figure S1. MALT1 proteolytic activity in B-ALL cell lines remains absent following pre-BCR crosslinking with anti-IgM or proteasomal inhibition with MG-132.**

(A) Immunoblot of protein lysates of MALT1 dependent (2F7, TOM-1, SUP-B15 and RS4;11) or independent (RAJI) B-ALL cell lines that were subjected to coculture with anti-IgM antibodies for 8h. TMD8 was used as a positive control. (B) Immunoblot analysis of the B-ALL cell line RS4;11 after 1 or 2h culture with or without MI-2 and/or MG-132.

B-ALL, B-cell acute lymphoblastic leukemia; BCR, B-cell receptor.

**Supplementary Figure S2. MI-2 fails to downregulate Myc in BALL-1 and RAJI.** Column analysis showing Myc expression changes in whole cell lysates of BALL-1 and RAJI in triplicate immunoblot assays following 0-2  $\mu$ M MI-2 treatment for 8 hours. Changes were not statistically significant compared to baseline when tested using ANOVA.

ANOVA, analysis of variance.

**Supplementary Figure S3. Effects of MALT1 inhibition on mRNA and protein levels of MYC, VPREB1, and BCL6.** Changes in mRNA level (log2) of (A) MYC, (B) VPREB1, and (C) BCL6 following an 8h treatment with 2  $\mu$ M of MI-2. Red lines define the three cell lines with available Myc protein western blot data, and less pronounced mRNA changes following MI-2 treatment. (D), analysis of relative change in mean fluorescence intensity (MFI) of VPREB1 in the indicated cell lines following a 48h treatment with 0-1  $\mu$ M of MI-2. (E) Relative changes in the expression of Bcl6 relative to  $\beta$ -Actin when measured by western blot in the indicated cell lines following an 8h treatment with MI-2.

**Supplementary Table S1. List of cell lines used according to lineage, level of maturation and Philadelphia chromosome status.** ABC-DLBCL, activated B-cell like diffuse large B-cell lymphoma; AML, acute myeloblastic leukemia; B-ALL, B-cell acute lymphoblastic leukemia; MCL, mantle cell lymphoma; T-ALL, T-cell acute lymphoblastic leukemia.

**Supplementary Table S2. List of down- or up-regulated genes by MI-2 in B-ALL.** List of 1036 genes whose expression changed  $\geq 2$ -fold at  $P < 0.05$  (275 down- and 761 up-regulated) following treatment of ALL cell lines (N=12) with 2  $\mu$ M of MI-2 for 8h.

B-ALL, B-cell acute lymphoblastic leukemia.

# Supplementary Figure S1

**A**

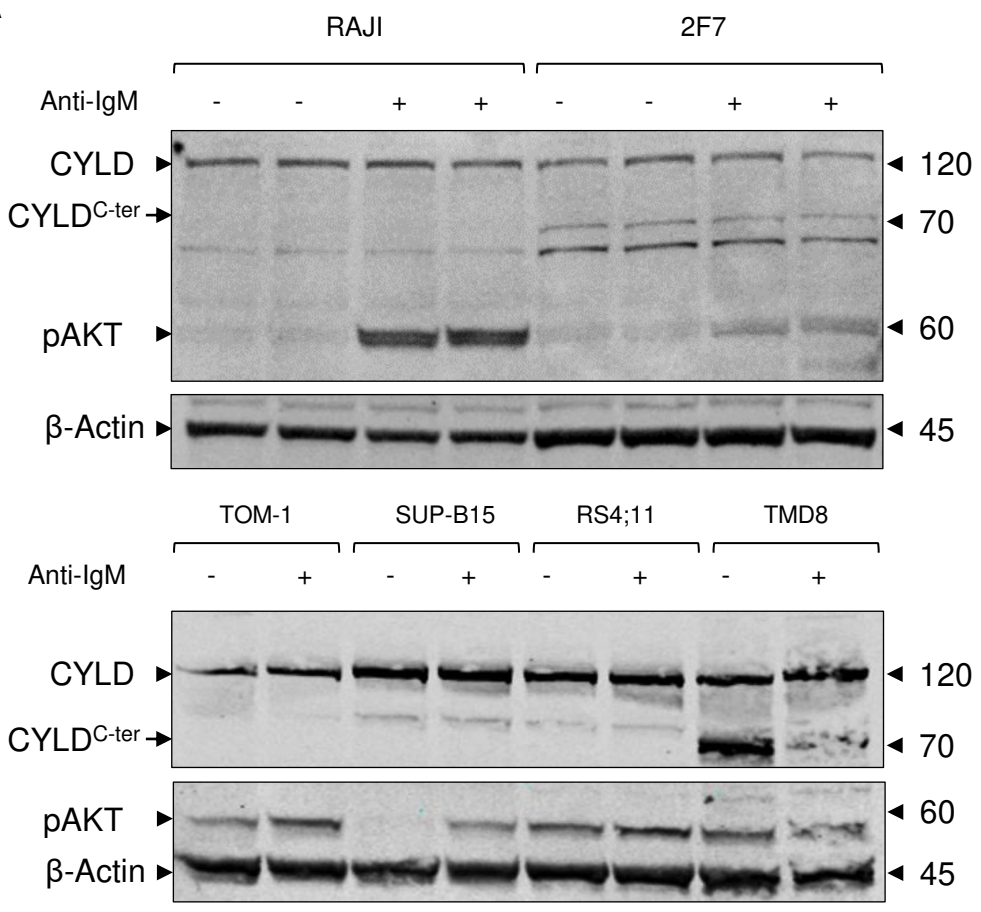

**B**

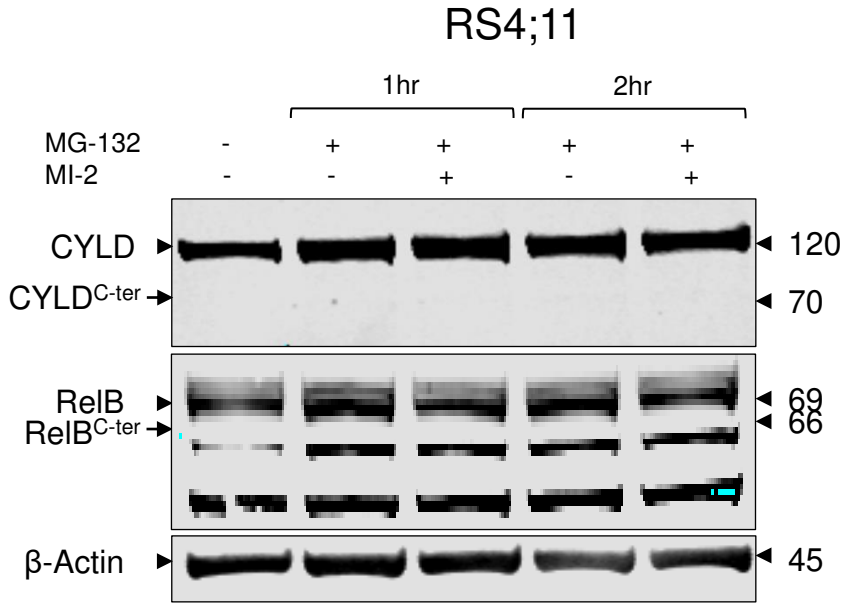

# Supplementary Figure S2

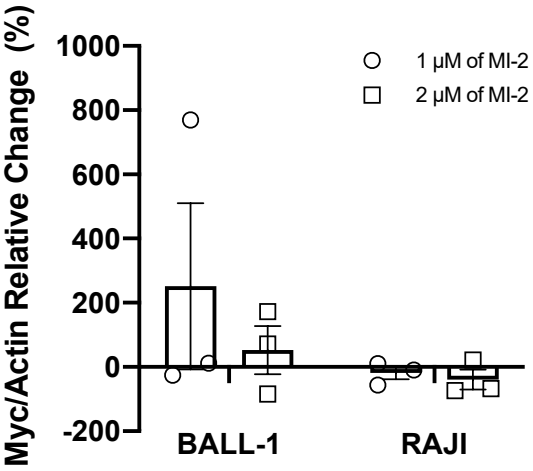

# Supplementary Figure S3

## A

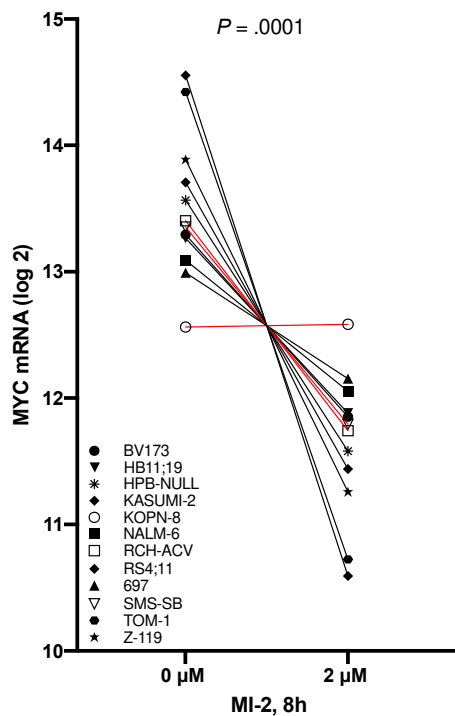

## B

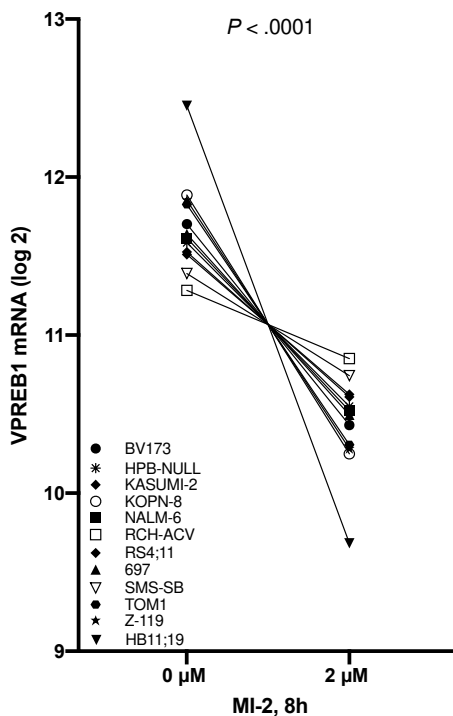

## C

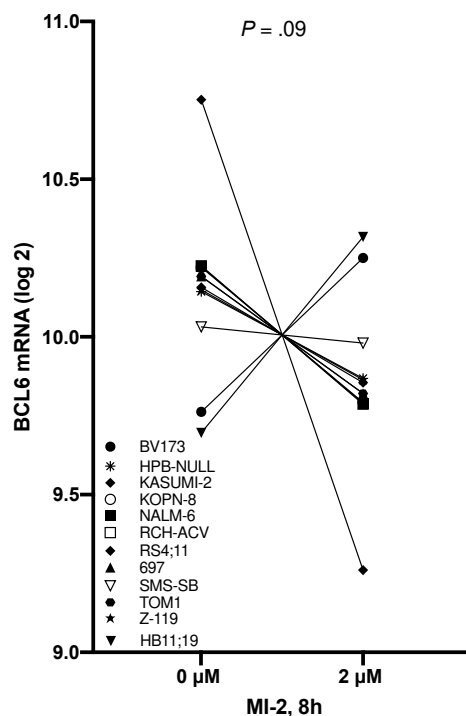

## D

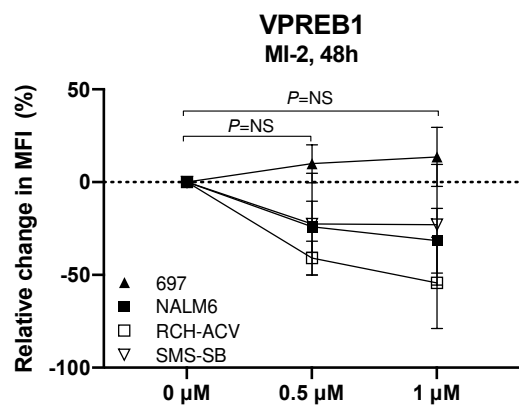

## E

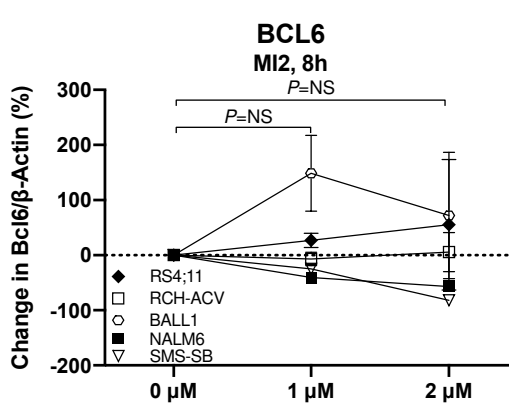



## Supplementary Table S1

| <b>B-ALL Cell line</b>      | <b>Lineage</b> | <b>Level of maturation</b> | <b>Philadelphia chromosome</b> |
|-----------------------------|----------------|----------------------------|--------------------------------|
| REH                         | B-ALL          | Pro-B                      | Negative                       |
| SUP-B15                     | B-ALL          | Pro-B                      | Positive                       |
| SEMK2                       | B-ALL          | Pro-B                      | Negative                       |
| BV-173                      | B-ALL          | Pro-B                      | Positive                       |
| TOM-1                       | B-ALL          | Pro-B                      | Positive                       |
| Z-119                       | B-ALL          | Pro-B                      | Positive                       |
| RS4;11                      | B-ALL          | Pro-B                      | Negative                       |
| HB11;19                     | B-ALL          | Pre-B                      | Negative                       |
| RCH-ACV                     | B-ALL          | Pre-B                      | Negative                       |
| NALM-6                      | B-ALL          | Pre-B                      | Negative                       |
| 697                         | B-ALL          | Pre-B                      | Negative                       |
| HPB-NULL                    | B-ALL          | Pre-B                      | Negative                       |
| SMS-SB                      | B-ALL          | Pre-B                      | Negative                       |
| KOPN-8                      | B-ALL          | Pre-B                      | Negative                       |
| RAJI                        | B-ALL          | Mature                     | Negative                       |
| RAMOS                       | B-ALL          | Mature                     | Negative                       |
| TANOUE                      | B-ALL          | Mature                     | Negative                       |
| GA-10                       | B-ALL          | Mature                     | Negative                       |
| 2F7                         | B-ALL          | Mature                     | Negative                       |
| BALL-1                      | B-ALL          | Mature                     | Negative                       |
| <b>Non B-ALL cell lines</b> |                |                            |                                |
| JURKAT                      | T-ALL          | -                          | -                              |
| LOUCY                       | T-ALL          | -                          | -                              |
| MOLT-4                      | T-ALL          | -                          | -                              |
| CCRF-CEM                    | T-ALL          | -                          | -                              |
| JVM2                        | MCL            | -                          | -                              |
| K562                        | AML            | -                          | -                              |
| TMD8                        | ABC-DLBC       | -                          | -                              |

## Supplementary Table S2

| Down-regulated genes (N=275) | Fold change (log2) |
|------------------------------|--------------------|
| GJA5                         | -3.948             |
| VPREB3                       | -2.098             |
| AHNAK2                       | -2.046             |
| CD248                        | -2.043             |
| SPIB                         | -2.004             |
| MYC                          | -1.870             |
| RASD2                        | -1.858             |
| MYBPH                        | -1.826             |
| ANGPTL2                      | -1.814             |
| AP003774.6                   | -1.812             |
| PTPN6                        | -1.804             |
| CD180                        | -1.794             |
| CD1A                         | -1.786             |
| LINC00940                    | -1.779             |
| KIAA1462                     | -1.776             |
| RP11-253E3.3                 | -1.768             |
| PRICKLE1                     | -1.767             |
| MARS2                        | -1.750             |
| HIC1                         | -1.744             |
| AP003774.4                   | -1.740             |
| TRIB1                        | -1.737             |
| IKZF3                        | -1.724             |
| TMEM229B                     | -1.712             |
| NRARP                        | -1.689             |
| GNAZ                         | -1.684             |
| TSSK5P                       | -1.664             |
| LLNLR-268E12.1               | -1.659             |
| RP1-47M23.3                  | -1.659             |
| DUSP2                        | -1.647             |
| CD1C                         | -1.645             |
| TLR10                        | -1.644             |
| CH507-42P11.8                | -1.643             |
| RASL10B                      | -1.623             |
| MFSD2A                       | -1.617             |
| CYTH4                        | -1.616             |
| TIFAB                        | -1.582             |
| ALDH1B1                      | -1.560             |
| RP11-330H6.6                 | -1.559             |
| LFNG                         | -1.537             |
| SIT1                         | -1.522             |
| PLD6                         | -1.520             |
| CTD-2562J17.6                | -1.519             |
| ALG1L9P                      | -1.514             |
| RGS19                        | -1.514             |
| RTN4RL1                      | -1.509             |

|               |        |
|---------------|--------|
| CSPG4         | -1.507 |
| EXOSC4        | -1.505 |
| AC104024.1    | -1.500 |
| SIK1          | -1.500 |
| CD3EAP        | -1.494 |
| APLN          | -1.487 |
| DDN           | -1.487 |
| RHOV          | -1.482 |
| CD82          | -1.472 |
| FFAR1         | -1.443 |
| C17orf96      | -1.437 |
| SLA           | -1.435 |
| SAMHD1        | -1.431 |
| SPTLC3        | -1.424 |
| LILRB2        | -1.421 |
| RIMBP3        | -1.416 |
| ALG1L8P       | -1.410 |
| RTN4R         | -1.396 |
| LYSMD2        | -1.396 |
| IRF8          | -1.393 |
| SCML4         | -1.392 |
| VWA1          | -1.391 |
| SH2B2         | -1.385 |
| NRXN2         | -1.381 |
| ACY3          | -1.381 |
| DUSP7         | -1.381 |
| F12           | -1.378 |
| FBLN1         | -1.377 |
| RP11-76C10.4  | -1.377 |
| FAM81A        | -1.372 |
| RP11-177C12.1 | -1.368 |
| HPDL          | -1.366 |
| PAQR7         | -1.362 |
| CICP22        | -1.347 |
| PI16          | -1.342 |
| RPS6KA4       | -1.338 |
| ID3           | -1.325 |
| LCK           | -1.325 |
| TEF           | -1.317 |
| RRS1          | -1.316 |
| PPARGC1B      | -1.315 |
| CXCR3         | -1.311 |
| ELFN1         | -1.308 |
| GS1-393G12.14 | -1.306 |
| DENND6B       | -1.304 |
| FNDC8         | -1.299 |
| ZCCHC24       | -1.297 |
| MB            | -1.293 |

|               |        |
|---------------|--------|
| RXFP4         | -1.291 |
| NAPSB         | -1.287 |
| CTC-360G5.9   | -1.284 |
| ASB13         | -1.282 |
| KLHL14        | -1.277 |
| AC006538.1    | -1.277 |
| RP11-172H24.4 | -1.277 |
| N4BP3         | -1.273 |
| RPS15AP11     | -1.271 |
| KCNA5         | -1.268 |
| AC019117.2    | -1.266 |
| CGN           | -1.260 |
| KIAA0930      | -1.253 |
| C22orf23      | -1.253 |
| RAET1E-AS1    | -1.244 |
| VPREB1        | -1.244 |
| NAT8L         | -1.240 |
| MEX3A         | -1.237 |
| AP001505.10   | -1.235 |
| ABCD2         | -1.233 |
| AC007040.11   | -1.229 |
| EPHA4         | -1.224 |
| SLC2A4        | -1.223 |
| ITPKA         | -1.220 |
| RAB20         | -1.217 |
| ITPRIPL1      | -1.215 |
| SDC1          | -1.215 |
| CCDC86        | -1.215 |
| IGLJ2         | -1.213 |
| ZNF296        | -1.211 |
| IGLC2         | -1.210 |
| PGA5          | -1.209 |
| MAP2K6        | -1.209 |
| RP3-342P20.2  | -1.206 |
| FCRLB         | -1.204 |
| RTP5          | -1.203 |
| LRTM2         | -1.202 |
| RP11-465L8.1  | -1.201 |
| USP18         | -1.200 |
| CD93          | -1.194 |
| RIMBP3B       | -1.190 |
| PRKAG2-AS1    | -1.183 |
| SMKR1         | -1.183 |
| TMEM121       | -1.182 |
| SOX18         | -1.182 |
| KCNJ2         | -1.177 |
| CTB-26E19.1   | -1.177 |
| AC011342.1    | -1.176 |

|               |        |
|---------------|--------|
| RP11-71G12.1  | -1.176 |
| HSPA12B       | -1.172 |
| RP11-566E18.1 | -1.168 |
| SAMD10        | -1.167 |
| AC021106.1    | -1.166 |
| BNIP3P41      | -1.162 |
| PTPRJ         | -1.161 |
| ZNRF3         | -1.158 |
| TNRC6C-AS1    | -1.158 |
| CBFA2T3       | -1.156 |
| AVPR2         | -1.155 |
| F2RL3         | -1.155 |
| SOWAHD        | -1.154 |
| RARA          | -1.153 |
| ELFN2         | -1.152 |
| PLD4          | -1.152 |
| SYNPO2L       | -1.151 |
| UNG           | -1.150 |
| ENC1          | -1.150 |
| C22orf15      | -1.149 |
| MYT1          | -1.149 |
| RP11-259N19.1 | -1.145 |
| SAPCD2        | -1.144 |
| RP13-616I3.1  | -1.141 |
| LILRA1        | -1.139 |
| NTHL1         | -1.137 |
| SCUBE1        | -1.134 |
| SYNPO         | -1.134 |
| CTC-471J1.10  | -1.132 |
| NT5M          | -1.131 |
| RP5-1039K5.12 | -1.129 |
| GJC2          | -1.128 |
| HIVEP3        | -1.127 |
| PCDHGC3       | -1.126 |
| PDLIM2        | -1.125 |
| RP11-435O5.4  | -1.124 |
| CD38          | -1.123 |
| PDGFA         | -1.121 |
| LINC00163     | -1.119 |
| HSH2D         | -1.117 |
| C15orf39      | -1.112 |
| FAM78A        | -1.110 |
| URB2          | -1.107 |
| TCEA3         | -1.105 |
| AC020743.3    | -1.098 |
| RP11-140I16.3 | -1.096 |
| CCDC85B       | -1.093 |
| TGM5          | -1.092 |

|                |        |
|----------------|--------|
| RP11-21L23.2   | -1.091 |
| FXN            | -1.091 |
| B4GAT1         | -1.091 |
| GLDC           | -1.089 |
| KBTBD8         | -1.088 |
| FUT7           | -1.085 |
| NR1D1          | -1.085 |
| TRIM47         | -1.084 |
| KLHL33         | -1.083 |
| AF064858.8     | -1.081 |
| SOX12          | -1.081 |
| CD34           | -1.080 |
| CXXC5          | -1.080 |
| ATP13A2        | -1.080 |
| PRDM15         | -1.075 |
| TNF            | -1.075 |
| SH3BP2         | -1.071 |
| UCK2           | -1.070 |
| UFSP1          | -1.069 |
| PLXNB2         | -1.068 |
| GRAP2          | -1.066 |
| SAMD11         | -1.066 |
| IL6R           | -1.065 |
| ITGB7          | -1.064 |
| PRKD2          | -1.063 |
| RUNX3          | -1.063 |
| TFAP4          | -1.062 |
| UBL4A          | -1.062 |
| RP5-1142A6.10  | -1.060 |
| P2RX5          | -1.056 |
| LCN8           | -1.049 |
| CDH3           | -1.049 |
| PKI55          | -1.048 |
| TMEM132A       | -1.048 |
| AC006946.15    | -1.048 |
| EML1           | -1.045 |
| PRRT4          | -1.044 |
| VASH1          | -1.043 |
| KIF26A         | -1.043 |
| CTD-2619J13.16 | -1.042 |
| C10orf2        | -1.041 |
| GNB1L          | -1.040 |
| BATF           | -1.038 |
| FAM222A        | -1.037 |
| KHK            | -1.037 |
| PUS7           | -1.036 |
| TTC16          | -1.033 |
| AC007880.1     | -1.031 |

|               |        |
|---------------|--------|
| OPRL1         | -1.029 |
| TMC8          | -1.028 |
| GRPEL1        | -1.028 |
| MYCL          | -1.028 |
| PHOSPHO1      | -1.027 |
| GJA3          | -1.023 |
| UBE2FP3       | -1.023 |
| SHANK1        | -1.019 |
| MRPL36        | -1.019 |
| GALNT6        | -1.019 |
| TLL12         | -1.018 |
| SLC2A5        | -1.018 |
| RP11-767C1.2  | -1.018 |
| XKR7          | -1.016 |
| SH2D5         | -1.015 |
| P2RY11        | -1.014 |
| SEMA7A        | -1.014 |
| EHD3          | -1.014 |
| ADPRHL1       | -1.013 |
| GEMIN4        | -1.013 |
| RIN1          | -1.012 |
| MYBPC2        | -1.012 |
| NOP16         | -1.011 |
| CEBPA         | -1.011 |
| AC018892.9    | -1.010 |
| RP11-76C10.3  | -1.007 |
| SNHG9         | -1.007 |
| RP11-447D11.3 | -1.007 |
| AMER1         | -1.006 |
| GCNT1         | -1.005 |
| RNU6-510P     | -1.005 |
| FMNL3         | -1.004 |
| TMEM170B      | -1.004 |
| DCTPP1        | -1.003 |
| RAB3A         | -1.003 |
| MYOZ3         | -1.001 |
| TP53I11       | -1.001 |
| BEND3         | -1.001 |

| <b>Up-regulated genes (N=761)</b> | <b>Fold change (log2)</b> |
|-----------------------------------|---------------------------|
| JUN                               | 5.031                     |
| RP11-443P15.2                     | 4.337                     |
| OSGIN1                            | 4.319                     |
| HMOX1                             | 4.084                     |
| LUCAT1                            | 3.914                     |
| MIR616                            | 3.640                     |
| HSPA6                             | 3.315                     |
| SLC7A11-AS1                       | 3.307                     |

|               |       |
|---------------|-------|
| ATF3          | 3.163 |
| HSPA1A        | 3.157 |
| RHOB          | 2.970 |
| DDIT3         | 2.945 |
| RGS1          | 2.907 |
| SLC7A11       | 2.903 |
| HSPA1B        | 2.860 |
| AC058791.1    | 2.793 |
| RP11-178L8.3  | 2.786 |
| AC016831.6    | 2.766 |
| MIR210HG      | 2.723 |
| CHAC1         | 2.692 |
| LINC-PINT     | 2.676 |
| NEAT1         | 2.667 |
| PPP1R15A      | 2.561 |
| CXCL8         | 2.497 |
| EGF           | 2.475 |
| DLGAP1-AS2    | 2.404 |
| SNORD14E      | 2.393 |
| RP11-138A9.1  | 2.327 |
| DLGAP1-AS1    | 2.323 |
| SNORA63       | 2.323 |
| EID3          | 2.319 |
| KLF2          | 2.259 |
| DNAJB4        | 2.256 |
| MPZ           | 2.251 |
| NQO1          | 2.156 |
| RP11-452J6.2  | 2.146 |
| ANKRD37       | 2.143 |
| SDAD1P1       | 2.133 |
| DUSP10        | 2.122 |
| AC103591.4    | 2.121 |
| CARS-AS1      | 2.117 |
| RP11-121L10.2 | 2.117 |
| TSC22D3       | 2.113 |
| ADM           | 2.096 |
| CREBRF        | 2.082 |
| PIGHP1        | 2.067 |
| MT1X          | 2.065 |
| RP11-138A9.2  | 2.054 |
| TMEM88        | 2.054 |
| KLF6          | 2.041 |
| TEX19         | 2.027 |
| BHLHE40       | 2.004 |
| CYP4F11       | 1.998 |
| MICD          | 1.994 |
| MIR22HG       | 1.980 |
| AC016831.7    | 1.964 |



|               |       |
|---------------|-------|
| TRGV9         | 1.954 |
| SNORA81       | 1.949 |
| ARRDC3        | 1.904 |
| RP11-13N13.6  | 1.901 |
| RNU6-216P     | 1.898 |
| RP11-888D10.4 | 1.890 |
| SNORA46       | 1.857 |
| LINC01354     | 1.856 |
| AC018766.6    | 1.850 |
| RP11-13N13.5  | 1.847 |
| KLHL24        | 1.833 |
| RAP1AP        | 1.831 |
| INHBE         | 1.823 |
| AC055733.4    | 1.819 |
| RP11-325K4.2  | 1.818 |
| GPNMB         | 1.810 |
| AC008982.2    | 1.808 |
| RP11-417F21.1 | 1.798 |
| RP11-173M1.5  | 1.798 |
| RP13-580F15.2 | 1.798 |
| RNU6-584P     | 1.797 |
| SLC12A8       | 1.784 |
| LSMEM1        | 1.777 |
| AC078852.1    | 1.774 |
| RP11-43P8.2   | 1.773 |
| RP11-46F15.2  | 1.773 |
| TCP11L2       | 1.753 |
| RP13-991F5.2  | 1.748 |
| GABARAPL1     | 1.745 |
| DEDD2         | 1.742 |
| RP5-1157M23.2 | 1.742 |
| RP1-168P16.3  | 1.741 |
| AMBP          | 1.739 |
| CTD-2529O21.1 | 1.739 |
| RPSAP36       | 1.737 |
| AC093732.1    | 1.736 |
| MAP1A         | 1.735 |
| SESN2         | 1.733 |
| RP11-603J24.7 | 1.730 |
| RP11-155O18.6 | 1.725 |
| BRSK2         | 1.711 |
| HCG27         | 1.709 |
| RHEBL1        | 1.708 |
| RP11-563N6.6  | 1.705 |
| CTA-276O3.4   | 1.702 |
| RP4-756G23.5  | 1.702 |
| Y_RNA         | 1.701 |
| RP11-638I2.9  | 1.699 |

|                |       |
|----------------|-------|
| RP11-106D4.2   | 1.689 |
| RP11-220I1.4   | 1.687 |
| GDAP1L1        | 1.687 |
| RP3-449M8.6    | 1.681 |
| RP4-758J24.6   | 1.678 |
| RP11-23N2.4    | 1.675 |
| RP11-20I23.2   | 1.671 |
| CTD-2521M24.5  | 1.668 |
| RP11-211N11.5  | 1.664 |
| RP1-34B20.21   | 1.663 |
| CLIP4          | 1.651 |
| RP11-498C9.12  | 1.649 |
| AC068580.6     | 1.644 |
| SLC26A5        | 1.644 |
| JUND           | 1.639 |
| HBP1           | 1.636 |
| MXD1           | 1.635 |
| MAFF           | 1.629 |
| LRRC70         | 1.629 |
| CTD-2363C16.2  | 1.629 |
| CTD-2184C24.2  | 1.620 |
| CTD-3252C9.4   | 1.620 |
| PNRC1          | 1.613 |
| RP11-335G20.7  | 1.609 |
| RP11-810P12.7  | 1.605 |
| RP11-631M21.7  | 1.600 |
| OSCAR          | 1.599 |
| CTA-228A9.4    | 1.596 |
| MIR193BHG      | 1.586 |
| RP11-364L4.1   | 1.578 |
| RP11-102M11.2  | 1.574 |
| RP11-141B14.1  | 1.572 |
| RP11-1017G21.6 | 1.571 |
| SYTL1          | 1.570 |
| CD69           | 1.569 |
| HSPA1L         | 1.569 |
| CTB-50L17.5    | 1.566 |
| RPL5P30        | 1.562 |
| CTB-193M12.3   | 1.560 |
| RP13-20L14.10  | 1.559 |
| LINC00942      | 1.557 |
| BEST1          | 1.554 |
| CHMP4BP1       | 1.553 |
| CCL3L3         | 1.552 |
| RP11-1023L17.2 | 1.550 |
| RP11-293M10.6  | 1.546 |
| VEGFA          | 1.540 |
| AC007386.4     | 1.539 |

|                  |       |
|------------------|-------|
| KIZ-AS1          | 1.539 |
| UBC              | 1.536 |
| VASN             | 1.535 |
| RP11-173A16.1    | 1.535 |
| RP11-1017G21.5   | 1.534 |
| DDIT4            | 1.527 |
| ASNS             | 1.523 |
| AC004837.5       | 1.519 |
| RNU6-548P        | 1.517 |
| RHOA-IT1         | 1.515 |
| DDX50P1          | 1.515 |
| LA16c-390E6.3    | 1.514 |
| TMEM150B         | 1.513 |
| MAFG             | 1.511 |
| CCDC17           | 1.508 |
| LCN12            | 1.499 |
| CCNG2            | 1.498 |
| RP4-724E16.2     | 1.496 |
| FLCN             | 1.492 |
| LIN37            | 1.491 |
| SUMO2P19         | 1.490 |
| RP11-174G6.5     | 1.489 |
| FOS              | 1.488 |
| RP11-485G7.5     | 1.487 |
| CTD-2410N18.4    | 1.486 |
| SLC25A39P1       | 1.486 |
| SLC2A3           | 1.485 |
| SLC6A9           | 1.484 |
| PMAIP1           | 1.478 |
| CCPG1            | 1.478 |
| CTD-2587H24.1    | 1.477 |
| OSER1-AS1        | 1.475 |
| ADM2             | 1.473 |
| GLYCTK-AS1       | 1.471 |
| UNKL             | 1.470 |
| ANXA1            | 1.469 |
| RP3-416J7.4      | 1.467 |
| RP11-737O24.3    | 1.463 |
| RP1-27K12.4      | 1.461 |
| Metazoa_SRP      | 1.461 |
| RP11-96K19.5     | 1.460 |
| TM6SF1           | 1.458 |
| RP11-564A8.8     | 1.456 |
| RAD17P2          | 1.451 |
| GP6              | 1.449 |
| XXbac-B444P24.14 | 1.449 |
| RP11-564A8.4     | 1.445 |
| PTOV1-AS1        | 1.444 |

|                    |       |
|--------------------|-------|
| AC084117.3         | 1.444 |
| RP11-400N9.1       | 1.444 |
| MARK2P8            | 1.443 |
| DNAJB1             | 1.441 |
| GPR55              | 1.440 |
| BAG3               | 1.440 |
| RP11-769O8.1       | 1.439 |
| RNU6-88P           | 1.435 |
| RP11-61L19.1       | 1.435 |
| CEBPB-AS1          | 1.435 |
| KLHL6-AS1          | 1.434 |
| RP3-406P24.5       | 1.432 |
| HNRNPA1P36         | 1.431 |
| LA16c-358B7.4      | 1.426 |
| NARF-IT1           | 1.424 |
| ANTXRLP1           | 1.421 |
| RP11-134L10.1      | 1.419 |
| HTR2B              | 1.417 |
| RP3-522J7.7        | 1.417 |
| IL23A              | 1.414 |
| KB-431C1.5         | 1.413 |
| XXbac-BPG299F13.17 | 1.413 |
| AC107081.5         | 1.412 |
| U73166.2           | 1.407 |
| RN7SL449P          | 1.407 |
| TAS2R20            | 1.406 |
| CTC-529I10.2       | 1.405 |
| RP11-192M23.1      | 1.404 |
| RP11-107E5.3       | 1.403 |
| RP3-465N24.5       | 1.399 |
| AC137932.4         | 1.397 |
| SH2D6              | 1.396 |
| RP11-347P5.1       | 1.395 |
| RND1               | 1.395 |
| SNORA9             | 1.394 |
| RP11-275F13.3      | 1.391 |
| CEBPB              | 1.388 |
| AC006128.2         | 1.388 |
| RP4-536B24.4       | 1.385 |
| RP11-113K21.6      | 1.385 |
| DLEU2L             | 1.379 |
| IFIT1P1            | 1.378 |
| CTD-2363C16.1      | 1.377 |
| C9orf173-AS1       | 1.377 |
| RP5-890E16.2       | 1.376 |
| RP11-348N5.9       | 1.374 |
| KRT18P63           | 1.374 |
| RP5-1021I20.5      | 1.372 |

|                        |       |
|------------------------|-------|
| RP11-392O17.2          | 1.368 |
| CTC-559E9.13           | 1.366 |
| RP11-642A1.1           | 1.366 |
| TAS2R6P                | 1.363 |
| RP11-180O5.2           | 1.362 |
| MIR425                 | 1.362 |
| RP11-467H10.1          | 1.360 |
| MALAT1                 | 1.359 |
| INHBC                  | 1.356 |
| CTD-2017C7.1           | 1.356 |
| PANX2                  | 1.355 |
| GUCY2F                 | 1.355 |
| RP11-498C9.4           | 1.355 |
| CTD-2542C24.5          | 1.354 |
| AC092652.3             | 1.352 |
| RNU6-118P              | 1.352 |
| AL513128.2             | 1.350 |
| RPL7P17                | 1.346 |
| RP11-484D2.4           | 1.345 |
| DTX2P1-UPK3BP1-PMS2P11 | 1.344 |
| CTB-46B19.2            | 1.342 |
| JDP2                   | 1.341 |
| AP001442.2             | 1.341 |
| CLK1                   | 1.340 |
| CTD-2083E4.4           | 1.339 |
| AL022341.3             | 1.336 |
| SLAMF7                 | 1.333 |
| LINC01176              | 1.332 |
| RP11-128N14.4          | 1.332 |
| RP11-34F20.7           | 1.328 |
| RP11-327P2.5           | 1.328 |
| RP11-713N11.6          | 1.327 |
| MIR99AHG               | 1.327 |
| RP11-596C23.2          | 1.327 |
| RP11-299J3.6           | 1.325 |
| HIPK1-AS1              | 1.325 |
| RP11-156E8.1           | 1.325 |
| RP11-50I19.2           | 1.324 |
| CTD-2047H16.4          | 1.322 |
| KMT2E-AS1              | 1.320 |
| RP11-61J19.5           | 1.319 |
| BBC3                   | 1.319 |
| C11orf65               | 1.319 |
| RP11-485M7.1           | 1.318 |
| RPSAP13                | 1.317 |
| ZNF295-AS1             | 1.316 |
| AC137932.6             | 1.316 |
| RP11-313D6.3           | 1.316 |

|                    |       |
|--------------------|-------|
| RP13-216E22.5      | 1.316 |
| AC006042.8         | 1.316 |
| AP000254.8         | 1.314 |
| TFE3               | 1.314 |
| RP1-140A9.1        | 1.311 |
| RNU4ATAC12P        | 1.309 |
| SERPINH1P1         | 1.309 |
| AP000640.10        | 1.308 |
| RP11-687E1.2       | 1.308 |
| ACTG1P24           | 1.306 |
| ATP6V0C            | 1.305 |
| RP5-915N17.11      | 1.304 |
| RP11-708J19.1      | 1.301 |
| Y_RNA              | 1.299 |
| AC139887.4         | 1.299 |
| RP11-476H16.1      | 1.298 |
| GABARAP            | 1.298 |
| CTD-2623N2.3       | 1.296 |
| SPATA1             | 1.294 |
| BTBD8              | 1.293 |
| SQSTM1             | 1.293 |
| RP11-135N5.3       | 1.292 |
| RP11-386I23.1      | 1.292 |
| NFKBIZ             | 1.291 |
| LA16c-390E6.4      | 1.291 |
| FBXW11P1           | 1.289 |
| RP11-230F18.6      | 1.288 |
| ZCWPW2             | 1.285 |
| AC093690.1         | 1.283 |
| RP11-45A17.2       | 1.282 |
| OCLM               | 1.282 |
| AL117339.5         | 1.281 |
| TMEM14EP           | 1.281 |
| RP11-394B2.6       | 1.277 |
| RP4-730K3.3        | 1.273 |
| RP11-686G8.2       | 1.271 |
| DUSP1              | 1.270 |
| ALDOA              | 1.270 |
| CCDC80             | 1.270 |
| RP11-437B10.1      | 1.268 |
| RP11-513G19.1      | 1.267 |
| PHBP12             | 1.265 |
| XXbac-BPG299F13.14 | 1.265 |
| RGS20              | 1.264 |
| RP11-44D5.1        | 1.261 |
| RP11-227G15.12     | 1.261 |
| CAHM               | 1.260 |
| RNA5SP82           | 1.259 |

|                |       |
|----------------|-------|
| CFLAR-AS1      | 1.259 |
| RP11-288H12.3  | 1.258 |
| RP11-613F22.6  | 1.258 |
| MIR93          | 1.254 |
| RP5-966M1.7    | 1.251 |
| GOLGA8H        | 1.251 |
| RP4-635E18.7   | 1.247 |
| SNORA47        | 1.246 |
| ISG20          | 1.246 |
| AC002059.10    | 1.245 |
| CBSL           | 1.245 |
| UBALD2         | 1.244 |
| RP11-638I2.10  | 1.243 |
| TRIM17         | 1.243 |
| RAB11FIP1P1    | 1.243 |
| AL109840.2     | 1.243 |
| SCRG1          | 1.243 |
| RP11-840I19.3  | 1.242 |
| TNFSF9         | 1.242 |
| RP4-569M23.4   | 1.241 |
| RP5-867C24.4   | 1.240 |
| SNORA72        | 1.237 |
| ABCB6          | 1.237 |
| C19orf73       | 1.237 |
| RP11-351C21.2  | 1.236 |
| COL24A1        | 1.235 |
| HIST1H3E       | 1.235 |
| NLRP12         | 1.234 |
| LINC00563      | 1.232 |
| CTD-2199O4.6   | 1.232 |
| RP5-864K19.4   | 1.232 |
| RP11-452J21.2  | 1.231 |
| CTC-507E2.2    | 1.231 |
| TMEM79         | 1.230 |
| CTC-459F4.1    | 1.230 |
| ZSWIM4         | 1.230 |
| ZSCAN5D        | 1.229 |
| PRDX3P1        | 1.229 |
| MIR3671        | 1.228 |
| RP3-368A4.6    | 1.227 |
| RP11-397E7.4   | 1.224 |
| RP11-1084A12.1 | 1.224 |
| RP11-242D8.3   | 1.223 |
| IFRD1          | 1.223 |
| AC091057.5     | 1.221 |
| RP1-253P7.4    | 1.221 |
| RP11-495P10.9  | 1.220 |
| CTD-2083E4.5   | 1.220 |

|                 |       |
|-----------------|-------|
| AC010149.4      | 1.220 |
| RPA4            | 1.219 |
| EIF4EP1         | 1.219 |
| ATP5HP4         | 1.219 |
| EEF1A1P3        | 1.218 |
| AC068580.5      | 1.218 |
| RP11-463O12.5   | 1.217 |
| RP11-348N5.7    | 1.216 |
| HRK             | 1.215 |
| RP3-508I15.22   | 1.215 |
| SETP5           | 1.215 |
| RP11-383C5.5    | 1.214 |
| DOCK3           | 1.213 |
| STC2            | 1.213 |
| AL035696.4      | 1.211 |
| RP11-82O19.2    | 1.210 |
| RP11-798M19.6   | 1.210 |
| AC016727.3      | 1.209 |
| RP11-690I21.1   | 1.209 |
| MIR6775         | 1.209 |
| RP11-166B2.8    | 1.208 |
| MTND1P23        | 1.206 |
| LL0XNC01-36H8.1 | 1.206 |
| RSL24D1P8       | 1.206 |
| TAS2R31         | 1.206 |
| GOLGA6L5P       | 1.205 |
| TNFAIP3         | 1.205 |
| RP11-471B22.2   | 1.204 |
| ACTG1P17        | 1.203 |
| ISCA1P4         | 1.203 |
| RP11-242D8.2    | 1.201 |
| PCK2            | 1.201 |
| RGS2            | 1.200 |
| ABTB1           | 1.200 |
| RP11-30L15.4    | 1.199 |
| AC012513.4      | 1.198 |
| CTD-2033C11.1   | 1.198 |
| SH3GL1P1        | 1.197 |
| RGS17P1         | 1.197 |
| RP11-616K22.1   | 1.197 |
| DENND5B-AS1     | 1.196 |
| GLYCTK          | 1.196 |
| CTD-2256P15.1   | 1.196 |
| AC091132.1      | 1.191 |
| RP11-397P13.6   | 1.190 |
| PLA2G6          | 1.189 |
| MIR553          | 1.188 |
| RP11-44N11.1    | 1.187 |



|               |       |
|---------------|-------|
| RP11-421E14.2 | 1.186 |
| GCLM          | 1.186 |
| LINC00106     | 1.185 |
| RP11-707G18.1 | 1.181 |
| KDM6B         | 1.180 |
| RP11-493E3.1  | 1.179 |
| GPAT3         | 1.178 |
| DARS-AS1      | 1.178 |
| AJ011931.1    | 1.177 |
| VLDLR-AS1     | 1.177 |
| RP11-640N20.4 | 1.177 |
| RP11-210K20.2 | 1.176 |
| RBM5-AS1      | 1.175 |
| FAM157C       | 1.174 |
| RP11-354A14.1 | 1.174 |
| RP11-454F8.2  | 1.174 |
| SLC35G2       | 1.173 |
| GGACT         | 1.170 |
| MTCYBP18      | 1.168 |
| CTA-363E19.2  | 1.163 |
| RPS16P5       | 1.163 |
| FAM84B        | 1.161 |
| AC144530.1    | 1.161 |
| METTL20       | 1.161 |
| RP11-417L19.5 | 1.160 |
| RP11-325K4.3  | 1.159 |
| GPR18         | 1.158 |
| RP4-530I15.9  | 1.157 |
| CH507-513H4.3 | 1.157 |
| H1FX-AS1      | 1.156 |
| AC097382.5    | 1.156 |
| RP11-96C23.9  | 1.155 |
| CTC-436K13.6  | 1.154 |
| ZBED2         | 1.154 |
| MAP1LC3B2     | 1.154 |
| AC100830.5    | 1.152 |
| RP11-277A4.4  | 1.152 |
| LINC01004     | 1.152 |
| CRELD1        | 1.152 |
| GEM           | 1.150 |
| TRGV2         | 1.148 |
| HLA-J         | 1.146 |
| NOXRED1       | 1.146 |
| FAM229A       | 1.145 |
| RP4-536B24.2  | 1.145 |
| CTD-2024I7.13 | 1.144 |
| KCP           | 1.143 |
| FOXP1-IT1     | 1.143 |

|               |       |
|---------------|-------|
| RP11-31F15.2  | 1.143 |
| POU5F2        | 1.143 |
| SLAMF6        | 1.142 |
| CATSPER3      | 1.142 |
| LCTL          | 1.139 |
| MBNL2         | 1.136 |
| AC006946.12   | 1.136 |
| CTD-2349P21.3 | 1.135 |
| RP5-1099D15.1 | 1.135 |
| CTD-2184D3.5  | 1.135 |
| ADGRG2        | 1.135 |
| RP11-473O4.3  | 1.134 |
| MUC6          | 1.133 |
| CTD-2371O3.3  | 1.133 |
| CTC-241N9.1   | 1.132 |
| RP11-297N6.4  | 1.132 |
| AC012358.4    | 1.131 |
| RN7SL809P     | 1.131 |
| RP4-584D14.6  | 1.131 |
| RP4-569M23.5  | 1.130 |
| RP11-157K17.5 | 1.130 |
| TAS2R15P      | 1.129 |
| TLR6          | 1.128 |
| CENPUP2       | 1.127 |
| ROCK1P1       | 1.127 |
| TXNIP         | 1.127 |
| RP3-415N12.1  | 1.126 |
| RP11-91P24.1  | 1.125 |
| RP11-114F3.5  | 1.125 |
| UBE2Q2P1      | 1.125 |
| PRR26         | 1.124 |
| DGCR12        | 1.123 |
| RP5-1092A3.4  | 1.123 |
| RP11-304F15.3 | 1.123 |
| RNA5SP108     | 1.122 |
| RP5-991G20.2  | 1.122 |
| SEPSECS-AS1   | 1.122 |
| KIAA1683      | 1.121 |
| RP11-214K3.23 | 1.121 |
| TMTC1         | 1.121 |
| CTD-2373H9.3  | 1.121 |
| RP11-796E2.4  | 1.120 |
| ATF5          | 1.119 |
| LINC00174     | 1.118 |
| DNM1P46       | 1.117 |
| RP11-84A19.4  | 1.115 |
| ST3GAL3       | 1.115 |
| RP11-428C19.4 | 1.115 |

|               |       |
|---------------|-------|
| RP11-485G7.6  | 1.114 |
| RP11-351A11.1 | 1.112 |
| RP11-977B10.2 | 1.111 |
| AC062029.1    | 1.109 |
| RP11-568G11.4 | 1.108 |
| RP11-357N13.6 | 1.108 |
| RP11-505P4.6  | 1.107 |
| CTC-453G23.8  | 1.106 |
| FBXO48        | 1.106 |
| CTC-325J23.2  | 1.105 |
| AC015971.2    | 1.105 |
| SPDYE16       | 1.104 |
| OLMALINC      | 1.104 |
| CDC42-IT1     | 1.103 |
| HHIP-AS1      | 1.103 |
| MME-AS1       | 1.102 |
| CALML6        | 1.101 |
| RP11-338I21.1 | 1.101 |
| AL109628.2    | 1.099 |
| OSER1         | 1.097 |
| RP11-214K3.20 | 1.097 |
| EXTL3-AS1     | 1.097 |
| ALKBH6        | 1.097 |
| TRGV7         | 1.096 |
| RNU6-100P     | 1.095 |
| RP11-575L7.8  | 1.095 |
| LINC01480     | 1.093 |
| PRADC1P1      | 1.093 |
| MIR3153       | 1.092 |
| GCNT7         | 1.090 |
| RP11-530C5.2  | 1.090 |
| RPS15AP10     | 1.089 |
| RP11-79N23.1  | 1.089 |
| SLFN14        | 1.088 |
| RP11-143J12.3 | 1.088 |
| RP1-179N16.6  | 1.087 |
| NDUFA4L2      | 1.087 |
| AC004834.1    | 1.087 |
| RP3-508I15.20 | 1.087 |
| RP11-74J13.8  | 1.086 |
| ARHGEF10      | 1.085 |
| CTB-52I2.4    | 1.084 |
| HIF1A-AS2     | 1.084 |
| RP11-778D9.12 | 1.083 |
| GPR61         | 1.082 |
| SLC30A1       | 1.082 |
| GADD45G       | 1.082 |
| RP11-326C3.16 | 1.082 |

|                |       |
|----------------|-------|
| ZNF793         | 1.080 |
| USP3-AS1       | 1.079 |
| CBLN3          | 1.079 |
| CH17-262A2.1   | 1.078 |
| UXT-AS1        | 1.078 |
| BACH1-IT2      | 1.077 |
| OPTN           | 1.077 |
| LINC00854      | 1.076 |
| RP11-85K15.3   | 1.076 |
| RP11-17G12.2   | 1.076 |
| XKR3           | 1.075 |
| YPEL5          | 1.075 |
| ASPN           | 1.075 |
| POU5F1P3       | 1.072 |
| XXcos-LUCA16.1 | 1.072 |
| EVI2A          | 1.072 |
| CTD-2313J17.1  | 1.071 |
| RP11-180M15.7  | 1.069 |
| RP13-753N3.1   | 1.069 |
| GGTA2P         | 1.068 |
| ST6GALNAC4P1   | 1.067 |
| LIMS1-AS1      | 1.067 |
| YPEL2          | 1.066 |
| ZBTB40-IT1     | 1.066 |
| RP11-575L7.4   | 1.066 |
| N4BP2L2-IT2    | 1.066 |
| RN7SL535P      | 1.065 |
| ASMTL-AS1      | 1.064 |
| AC005551.1     | 1.064 |
| HNRNPA3P11     | 1.063 |
| AC005519.4     | 1.062 |
| ZC3H6          | 1.062 |
| RP11-379C10.4  | 1.062 |
| RP11-767N6.2   | 1.060 |
| RP11-45A17.4   | 1.060 |
| HCG2040054     | 1.060 |
| RP11-164P12.3  | 1.059 |
| TMEM156        | 1.059 |
| PET100         | 1.058 |
| RP11-154D6.1   | 1.058 |
| AL390957.1     | 1.058 |
| KIAA0196-AS1   | 1.057 |
| AK8            | 1.056 |
| RP11-173A6.2   | 1.055 |
| RP11-84G21.1   | 1.055 |
| RP11-118E18.4  | 1.054 |
| RP11-245D16.4  | 1.054 |
| LRRC63         | 1.054 |

|               |       |
|---------------|-------|
| RP11-21M24.3  | 1.053 |
| RP11-752G15.8 | 1.052 |
| RHBDL2        | 1.051 |
| ATP10B        | 1.051 |
| IRF9          | 1.050 |
| RP11-197M22.2 | 1.050 |
| RNASEK        | 1.050 |
| CTD-2284J15.1 | 1.048 |
| ENTPD3        | 1.047 |
| ETF1P2        | 1.047 |
| RP11-284M14.1 | 1.047 |
| MTND5P11      | 1.046 |
| CTD-2522E6.4  | 1.046 |
| RP1-225E12.2  | 1.046 |
| RP11-365F18.3 | 1.046 |
| LIMD1-AS1     | 1.046 |
| GAPDHP22      | 1.045 |
| RGS13         | 1.045 |
| RP11-197N18.8 | 1.044 |
| GPT2          | 1.044 |
| IL21R-AS1     | 1.044 |
| RP11-61K9.3   | 1.044 |
| HERPUD1       | 1.043 |
| ADIRF-AS1     | 1.043 |
| RP1-283E3.8   | 1.042 |
| RP11-455I9.1  | 1.042 |
| AC009120.11   | 1.042 |
| SLC25A34      | 1.042 |
| LLNLR-246C6.1 | 1.041 |
| RP11-715F3.2  | 1.041 |
| VAC14-AS1     | 1.040 |
| RP11-188C12.2 | 1.040 |
| SCGB2B2       | 1.040 |
| RP11-798G7.5  | 1.040 |
| ACTG1P14      | 1.040 |
| Y_RNA         | 1.039 |
| RP11-609N14.4 | 1.039 |
| ZFAND2A       | 1.039 |
| RP11-261P9.4  | 1.038 |
| IGHV7-81      | 1.038 |
| ZNF674        | 1.037 |
| GOLGA8VP      | 1.036 |
| RP11-855A2.2  | 1.036 |
| RP11-347I19.8 | 1.036 |
| PLCD1         | 1.036 |
| RP11-394B2.5  | 1.036 |
| HMGB1P31      | 1.036 |
| RP11-485M7.2  | 1.035 |

|                |       |
|----------------|-------|
| SRP72P2        | 1.035 |
| RTEL1-TNFRSF6B | 1.033 |
| CTC-203F4.2    | 1.033 |
| RP11-75A9.3    | 1.033 |
| ST3GAL1P1      | 1.033 |
| AC137932.5     | 1.032 |
| RP11-603J24.5  | 1.031 |
| AL139424.2     | 1.031 |
| NIPSNAP3B      | 1.031 |
| RP13-487P22.1  | 1.031 |
| CTD-2342J14.6  | 1.030 |
| STYK1          | 1.030 |
| RP11-544A12.8  | 1.030 |
| RP11-334C17.3  | 1.029 |
| TCAF2          | 1.029 |
| AC009303.1     | 1.028 |
| CTA-984G1.5    | 1.027 |
| RP11-546B15.1  | 1.026 |
| ZNF441         | 1.024 |
| RP1-228P16.1   | 1.024 |
| RP11-823P9.3   | 1.023 |
| AC069257.6     | 1.023 |
| RP11-863K10.4  | 1.022 |
| AC004623.3     | 1.021 |
| RP11-92K15.3   | 1.021 |
| RP11-58A17.3   | 1.021 |
| YPEL3          | 1.021 |
| CYP51A1-AS1    | 1.020 |
| CARS           | 1.020 |
| KDM3A          | 1.020 |
| AC093110.3     | 1.020 |
| TUBB3          | 1.020 |
| CTC-265F19.1   | 1.020 |
| RP11-2B6.3     | 1.019 |
| IRF2BP2        | 1.019 |
| ARIH2OS        | 1.019 |
| NFKB2          | 1.018 |
| CTA-972D3.2    | 1.018 |
| KB-1410C5.5    | 1.017 |
| RP1-86C11.7    | 1.017 |
| SNX16          | 1.016 |
| AC005387.2     | 1.016 |
| AL021918.4     | 1.016 |
| LINC00921      | 1.014 |
| PROC           | 1.014 |
| NTAN1P2        | 1.014 |
| HIST2H4A       | 1.014 |
| FLJ35934       | 1.013 |

|                |       |
|----------------|-------|
| ST8SIA1        | 1.013 |
| CTB-50L17.9    | 1.012 |
| CITF22-92A6.1  | 1.012 |
| RP11-627K11.3  | 1.012 |
| RIMKLBP2       | 1.011 |
| RP11-513M16.7  | 1.011 |
| RNU5A-1        | 1.010 |
| RP11-102M11.1  | 1.010 |
| SLC3A2         | 1.010 |
| TP53INP1       | 1.010 |
| RP11-440L14.1  | 1.010 |
| AC093901.1     | 1.009 |
| TPPP           | 1.009 |
| RP13-870H17.3  | 1.008 |
| RP11-714G18.1  | 1.008 |
| B4GALNT1       | 1.008 |
| RP11-752G15.10 | 1.007 |
| RP1-30M3.6     | 1.007 |
| RN7SL280P      | 1.006 |
| HSD17B7P2      | 1.006 |
| RP11-474P2.2   | 1.006 |
| RPL7AP10       | 1.006 |
| ULBP2          | 1.006 |
| ACKR4          | 1.005 |
| FER1L5         | 1.005 |
| RP1-47A17.1    | 1.005 |
| MORF4L2-AS1    | 1.004 |
| RP11-267M23.6  | 1.004 |
| RNU6ATAC16P    | 1.003 |
| AF011889.5     | 1.002 |
| CSNK1G2-AS1    | 1.001 |
| CTC-524C5.2    | 1.001 |
| CALCRL         | 1.001 |
